# Supplementary material for: Increasing large scale windstorm damage in Western, Central and Northern European forests, 1951–2010
Source: PubMed Central journal article supplement (PMC5388877; doi:10.1038/srep46397), 2017-04-12
Supplement: srep46397-s1.pdf [file srep46397-s1.pdf]

1 **Supplementary Information**

2 **Increasing large scale windstorm damage in Western, Central and Northern European**  
3 **forests, 1951-2010**

4 **H. Gregow<sup>1</sup>, A. Laaksonen<sup>1,2</sup>, M.E. Alper<sup>1</sup>**

5 [1] Finnish Meteorological Institute, P.O. Box 503, FI-00101 Helsinki, Finland

6 [2] University of Eastern Finland

7

8 Harmonizing the two datasets Gold and FAO and building decadal values for Northern, Western  
9 and Central Europe were accomplished by using linear regression and the data of Table S1. The  
10 overlapping period of 1990–2000 is shown in Fig.S1. There is very little difference in these two  
11 datasets.

12 **Table S1. FAO-values of TGS (Mm<sup>3</sup>) for the 17 countries in focus in years 1990, 2000, 2005**  
13 **and 2010.**

| Nr | Country        | 1990     | 2000     | 2005     | 2010     |
|----|----------------|----------|----------|----------|----------|
| 1  | Finland        | 1877,893 | 2082,112 | 2189,146 | 2189,146 |
| 2  | Norway         | 701      | 809      | 898      | 987      |
| 3  | Sweden         | 2791,2   | 3033,6   | 3234     | 3358     |
| 4  | Denmark        | 64,9     | 74,3     | 106,3    | 108,4    |
| 5  | Austria        | 947      | 1088     | 1159     | 1135     |
| 6  | Belgium        | 128      | 157,4    | 164,1    | 167,9    |
| 7  | Luxembourg     | 20,38    | 25,95    | 25,95    | 25,95    |
| 8  | France         | 2077     | 2254     | 2512     | 2584     |
| 9  | Ireland        | 61,5     | 69,6     | 70,6     | 74,3     |
| 10 | Netherlands    | 52       | 61       | 65       | 70       |
| 11 | United Kingdom | 282      | 309      | 340      | 379      |
| 12 | Germany        | 2815     | 3381     | 3458     | 3492     |
| 13 | Czech Republic | 625,2    | 698,8    | 735      | 769,3    |
| 14 | Hungary        | 288,007  | 325,165  | 341,394  | 359,387  |
| 15 | Poland         | 1485     | 1736     | 1909     | 2049     |
| 16 | Slovakia       | 401,6    | 463,2    | 494,6    | 514,1    |
| 17 | Switzerland    | 392      | 416      | 422      | 428      |

14

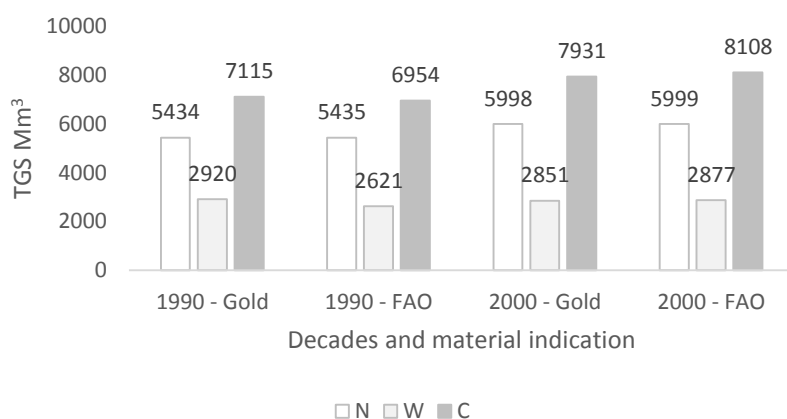

15

16 **Fig.S1 Intercomparison of FAO and Gold reported TGS (Mm<sup>3</sup>) values 1990-2010.**

17 Estimated total growing stock of the countries for milestone years 1950, 1960, 1970, 1980, 1990,  
 18 2000 and 2010 in which Gold and FAO statistics have been combined for the last two decades. The  
 19 decadal growth rate has been assessed based on the linear fit between the known milestone years.

20 **Table S2. The regional average for Western, Central and Northern Europe is given as the**  
 21 **cumulative sum in TGS.**

| Decade                | 1950            | 1960            | 1970            | 1980            | 1990            | 2000            | 2010            |
|-----------------------|-----------------|-----------------|-----------------|-----------------|-----------------|-----------------|-----------------|
| Sweden                | 1666,7          | 1905,57         | 2144,44         | 2383,31         | 2622,18         | 2861,05         | 3099,92         |
| Finland               | 1314            | 1478,825        | 1643,65         | 1808,475        | 1973,3          | 2138,125        | 2302,95         |
| Norway                | 329             | 414,365         | 499,73          | 585,095         | 670,46          | 755,825         | 841,19          |
| Denmark               | 46,5            | 52,6765         | 58,853          | 65,0295         | 71,206          | 77,3825         | 83,559          |
| Germany               | 741,87          | 1283,32         | 1824,77         | 2149,64         | 2799,38         | 3232,54         | 3492            |
| Czech Republic        | 368             | 453             | 538             | 589             | 624             | 699             | 769,3           |
| Hungary               | 155,31          | 189,16          | 223,01          | 243,32          | 283,94          | 311,02          | 359,387         |
| Poland                | 1002,5          | 1170            | 1337,5          | 1438            | 1639            | 1773            | 2049            |
| Slovakia              | 215,9           | 282,4           | 348,9           | 388,8           | 468,6           | 521,8           | 514,1           |
| Austria               | 657,02          | 738,72          | 820,42          | 869,44          | 967,48          | 1032,84         | 1135            |
| Switzerland           | 200             | 235             | 270             | 291             | 333             | 361             | 428             |
| Belgium               | 54,3618         | 76,6281         | 92,5326         | 98,8944         | 127,5225        | 146,6079        | 168             |
| France                | 1127,728        | 1384,924        | 1599,254        | 1892,986        | 2370,78         | 2172,976        | 2584            |
| Ireland               | 3,88            | 12,64           | 19,94           | 22,86           | 36              | 44,76           | 74              |
| Luxembourg            | 8,8             | 11,6            | 13,6            | 14,4            | 18              | 20,4            | 26              |
| Netherlands           | 6,04            | 18,08           | 26,68           | 30,12           | 45,6            | 55,92           | 70              |
| United Kingdom        | 85,872          | 150,216         | 203,836         | 225,284         | 321,8           | 410,2           | 379             |
| <b>Cumulative TGS</b> | <b>7983,482</b> | <b>9857,125</b> | <b>11665,12</b> | <b>13095,65</b> | <b>15372,25</b> | <b>16614,45</b> | <b>18375,41</b> |

22

23 **Table S3. Based on the data in Table S2, the annual volume of TGS in Western, Central and**  
 24 **Europe was estimated.**

| <b>Annual<br/>volume TGS<br/>(Mm<sup>3</sup>)</b> | <b>1950</b>     | <b>1960</b>     | <b>1970</b>     | <b>1980</b>     | <b>1990</b>     | <b>2000</b>     |
|---------------------------------------------------|-----------------|-----------------|-----------------|-----------------|-----------------|-----------------|
| <b>0</b>                                          | <b>7983,482</b> | <b>9857,125</b> | <b>11665,12</b> | <b>13095,65</b> | <b>15372,25</b> | <b>16614,45</b> |
| 1                                                 | 8170,846        | 10037,92        | 11808,17        | 13323,31        | 15496,47        | 16790,54        |
| 2                                                 | 8358,21         | 10218,72        | 11951,22        | 13550,97        | 15620,69        | 16966,64        |
| 3                                                 | 8545,575        | 10399,52        | 12094,28        | 13778,63        | 15744,91        | 17142,73        |
| 4                                                 | 8732,939        | 10580,32        | 12237,33        | 14006,29        | 15869,13        | 17318,83        |
| 5                                                 | 8920,303        | 10761,12        | 12380,38        | 14233,95        | 15993,35        | 17494,93        |
| 6                                                 | 9107,667        | 10941,92        | 12523,44        | 14461,61        | 16117,57        | 17671,02        |
| 7                                                 | 9295,032        | 11122,72        | 12666,49        | 14689,27        | 16241,79        | 17847,12        |
| 8                                                 | 9482,396        | 11303,52        | 12809,55        | 14916,93        | 16366,01        | 18023,21        |
| 9                                                 | 9669,76         | 11484,32        | 12952,6         | 15144,59        | 16490,23        | 18199,31        |

25

26 The large scale storms (PD/TGS  $\geq$  0.012%) could be identified in Western, Central and Northern  
 27 Europe (Table S4). If the date was missing, the storm type could not be assessed, but the damage  
 28 could be added to the cumulative value of a region. The greatest uncertainty remains in the storms  
 29 from Sweden in 1954 and 1955. The overall damage report shows total damage of 18.45 Mm<sup>3</sup>;  
 30 however, it was clearly noted that the storm on January 3–4 in 1954 was the main reason for the  
 31 damage. According to the SMHI (Swedish Meteorological and Hydrological Institute), the storm on  
 32 January 3, 1954, caused 36 m/s storm winds and a storm on November 12, 1954, (with highest wind  
 33 speeds of 33 m/s) was a strong one over the western coast. Primary damages of 18.45 Mm<sup>3</sup> in the  
 34 EFIATLANTIC database are given for 1954 as a sum, with storm dates. Due to a lack of better  
 35 knowledge, we divided the storm damage according to the following: 15 Mm<sup>3</sup> PD was marked for  
 36 January 3–4, representing DJF in 1954, and PD of 3.45 Mm<sup>3</sup> was left for the period of SON in 1954  
 37 and DJF in 1955. Knowing the storms, wind speeds and reanalysed maps, it is very likely that the  
 38 division is close to correct.

39 **Table S4. The severe storms causing at least PD/TGS=0.012% damage were investigated**  
 40 **based on year, region, primary damage, season, monthly mean NAO and for some storms also**  
 41 **on gust wind speeds.**

| Gust<br>wind<br>ms <sup>-1</sup> | TGS<br>Mm <sup>3</sup> | Year | Part of<br>Europe | PD<br>(Mm3) | NAO<br>index | Season | PD/TGS   |
|----------------------------------|------------------------|------|-------------------|-------------|--------------|--------|----------|
|                                  | 8545,575               | 1953 | West              | 1,8         | 0,06         | DJF    | 0,000211 |
|                                  | 8732,939               | 1954 | Northern          | 15          | 0,11         | DJF    | 0,001718 |
|                                  | 8920,303               | 1955 | Central           | 8,9         | -1,01        | DJF    | 0,000998 |
|                                  | 8920,303               | 1955 | Central           | 2           | 1,013        | DJF    | 0,000224 |
|                                  | 9107,667               | 1956 | Northern          | 3,7         | 0,021        | DJF    | 0,000406 |
|                                  | 9482,396               | 1958 | Central           | 2,38        | -0,81        | JJA    | 0,000251 |
|                                  | 10037,92               | 1961 | Central           | 2,5         | 0,06         | DJF    | 0,000249 |
|                                  | 10198,86               | 1962 | Northern          | 2           | 0,55         | DJF    | 0,000196 |
|                                  | 10218,72               | 1962 | Central           | 2,3         | 0,55         | DJF    | 0,000225 |
|                                  | 10218,72               | 1962 | Central           | 2,1         | -0,23        | SON    | 0,000206 |
|                                  | 11122,72               | 1967 | Central           | 14          | 0,19         | DJF    | 0,001259 |
|                                  | 11122,72               | 1967 | Central           | 2           | 0,19         | DJF    | 0,00018  |
|                                  | 11122,72               | 1967 | Central           | 2           | 1,51         | MAM    | 0,00018  |
|                                  | 11122,72               | 1967 | Northern          | 2,34        | 0,07         | SON    | 0,00021  |
|                                  | 11122,72               | 1967 | Northern          | 4,47        | 0,07         | SON    | 0,000402 |
|                                  | 11484,32               | 1969 | Northern          | 27,5        | 2,07         | SON    | 0,002395 |
|                                  | 11484,32               | 1969 | Northern          | 5           | 2,07         | SON    | 0,000435 |
|                                  | 11484,32               | 1969 | Northern          | 10          | -0,96        | SON    | 0,000871 |
|                                  | 11808,17               | 1971 | Northern          | 2           | -1,13        | DJF    | 0,000169 |
|                                  | 11808,17               | 1971 | Northern          | 2           | 0,58         | SON    | 0,000169 |
|                                  | 11808,17               | 1971 | Northern          | 2           | -0,2         | SON    | 0,000169 |
|                                  | 11951,22               | 1972 | Central           | 18          | 0,54         | SON    | 0,001506 |
|                                  | 12523,44               | 1976 | Central           | 9           | -0,25        | DJF    | 0,000719 |
|                                  | 12809,55               | 1978 | Northern          | 2,5         | 3,04         | SON    | 0,000195 |
|                                  | 13323,31               | 1981 | Northern          | 3,9         | 0,92         | DJF    | 0,000293 |
|                                  | 13323,31               | 1981 | Northern          | 3,9         | 0,36         | MAM    | 0,000293 |
| 32                               | 13323,31               | 1981 | Northern          | 3,23        | -0,38        | SON    | 0,000242 |
|                                  | 13550,97               | 1982 | Northern          | 3           | 1,76         | SON    | 0,000221 |
|                                  | 13550,97               | 1982 | Western           | 12          | 1,6          | SON    | 0,000886 |
|                                  | 14006,29               | 1984 | Western           | 2,5         | -0,07        | JJA    | 0,000178 |
| 44,7                             | 14006,29               | 1984 | Western           | 2           | -0,07        | SON    | 0,000143 |
| 43                               | 14006,29               | 1984 | W, C              | 22          | -0,06        | SON    | 0,001571 |
|                                  | 14233,95               | 1985 | Northern          | 4           | 0,9          | SON    | 0,000281 |
| 43,2                             | 14461,61               | 1986 | Central           | 2           | 1,11         | DJF    | 0,000138 |
| 47,3                             | 14689,27               | 1987 | W,C,N             | 13,3        | 0,14         | SON    | 0,000905 |
| 48,5                             | 15372,25               | 1990 | Western           | 8           | 1,04         | DJF    | 0,00052  |
| 45,4                             | 15372,25               | 1990 | Central           | 5,1         | 1,41         | DJF    | 0,000332 |

|      |          |      |             |      |       |     |          |
|------|----------|------|-------------|------|-------|-----|----------|
|      | 15372,25 | 1990 | Western     | 5,5  | 1,41  | DJF | 0,000358 |
| 50,7 | 15372,25 | 1990 | Central     | 11,3 | 1,41  | DJF | 0,000735 |
| 50,8 | 15372,25 | 1990 | Central     | 83,5 | 1,46  | MAM | 0,005432 |
|      | 15620,69 | 1992 | Northern    | 2    | -0,13 | DJF | 0,000128 |
|      | 15993,35 | 1995 | Northern    | 5,8  | -1,38 | SON | 0,000363 |
| 50,2 | 16490,23 | 1999 | Northern    | 5    | 0,65  | SON | 0,000303 |
|      | 16490,23 | 1999 | Northern    | 3,5  | 1,61  | DJF | 0,000212 |
|      |          |      | Western and |      |       |     |          |
| 55,7 | 16490,23 | 1999 | Central     | 138  | 1,61  | DJF | 0,008369 |
| 54,7 | 16490,23 | 1999 | Western     | 90   | 1,61  | DJF | 0,005458 |
|      | 16614,45 | 2000 | Northern    | 3,6  | 0,6   | DJF | 0,000217 |
|      | 16790,54 | 2001 | Northern    | 3    | -0,24 | SON | 0,000179 |
|      | 16790,54 | 2001 | Northern    | 6,1  | 0,6   | SON | 0,000363 |
|      | 16966,64 | 2002 | Northern    | 2    | 0,6   | DJF | 0,000118 |
|      | 17155,16 | 2004 | Central     | 5,4  | 0,73  | SON | 0,000315 |
| 46,8 | 17318,83 | 2005 | Northern    | 77   | 1,52  | DJF | 0,004446 |
|      | 17847,12 | 2007 | Northern    | 12   | 0,22  | DJF | 0,000672 |
| 50,7 | 17847,12 | 2007 | Central     | 49   | 0,22  | DJF | 0,002746 |
| 47   | 18199,31 | 2009 | Western     | 44,2 | -0,06 | DJF | 0,002429 |
| 41,9 | 18375,41 | 2010 | Central     | 3,59 | -1,98 | DJF | 0,000195 |
